# Supplementary material for: Roll-to-roll gravure printing of thick-film silver electrode micropatterns for flexible printed circuit board
Source: Springer Nature journal article supplement (doi:10.1007/s11998-016-9844-y), 2016-10-13
Supplement: MOESM1 [file 10878716]

**SUPPORTING** **INFORMATION**

**(a)**

**
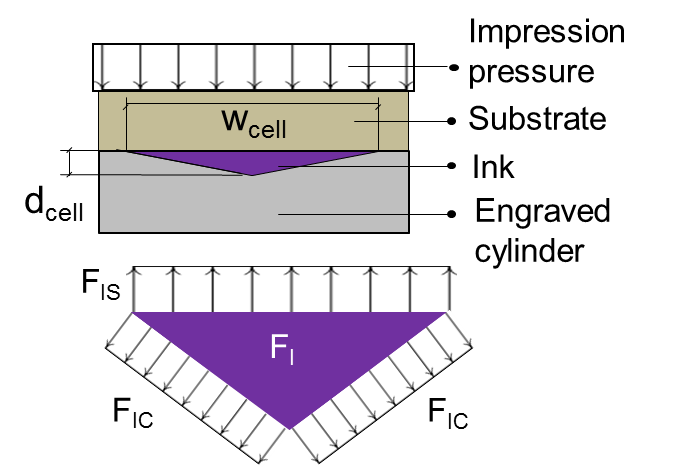
**

**(b)**

**
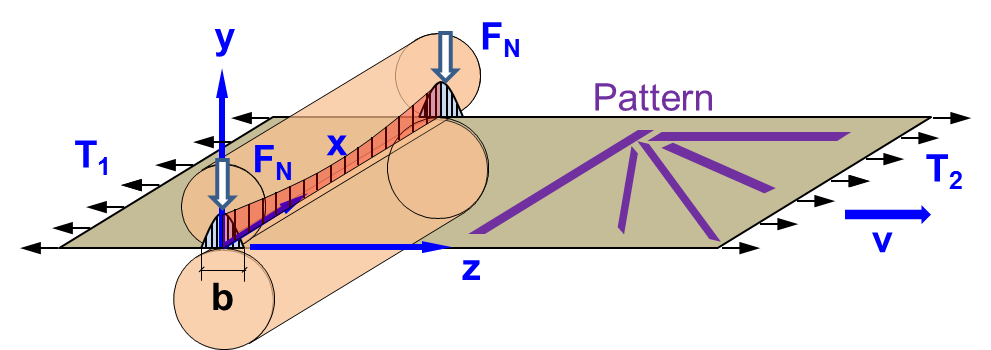
**

**(c)**

**
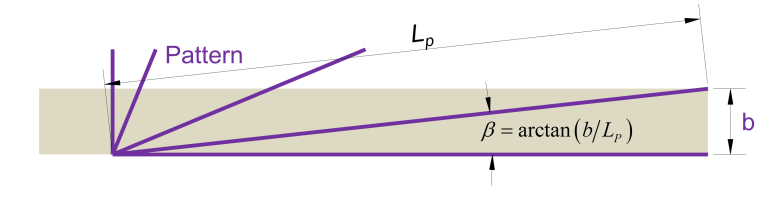
**

**Fig S1: Schematic diagram of: (a) ink transfer model; (b) total force applied on flexible substrate in rotogravure printing; and (c) calculation of the interfacial contact area, *AIS***

The ink transfer condition of the adhesive force, *FIC = WIC. AIC*, is smaller than both the cohesive force, *FI*, and the adhesive force, *FIS= WIS. AIS*, as shown in Fig. S1(a)S1. Therefore, the printability, as indicated by the ink transfer, is a function of the interfacial contact area, *AIS* and the work done by the adhesive substrate *WIS.* Increased *AIS* causes increased printability. Fig. S1(b) shows the total force applied on the substrate. Because the total force of the impression (*FN*) results in the *AIS* as a function of the foot print of the impression roller (*b*) and the printing angle (*α*) as shown in Fig. S1(c), the *AIS* can be computed by the following, which is provided as Eq. (5) in the main text:

(5)

Ref_S1: Nguyen, HAD, Lee, C, Shin, K-H and Lee, D, "An Investigation of the Ink-Transfer Mechanism During the Printing Phase of High-Resolution Roll-to-Roll Gravure Printing." IEEE Transactions on Components, Packaging and Manufacturing Technology, 5 (10) 1516-1524 (2015)
